# Supplementary material
Source: HighWire-hosted journal article supplement (https://bmjopenquality.bmj.com/highwire/filestream/145337/field_highwire_adjunct_files/0/bmjoq-2022-002161supp001_data_supplement.pdf)
Supplement: bmjoq-2022-002161supp001_data_supplement.pdf [file bmjoq-2022-002161supp001_data_supplement.pdf]

**Supplemental figure captions**

**Figure 1-** This is the long-form 4AT assessment tool form that is found on the 4AT website, <https://www.the4at.com/4at-images/4at> This acts as the basis for the 4AT adhesive sticker.

**Figure 2-** This is the A7 size 4AT adhesive sticker used in the project and described as one of the interventions.

**Figure 3-** The A7 adhesive sticker in figure 2 is presented in a mock-up of a ward round in the same continuation notes sheet that was used on the wards where interventions took place. This figure serves to illustrate the way in which the stickers were designed to be used.

**Figure 4-** This figure illustrates the typical patient journey of a surgical inpatient in this centre and the locations where 4AT assessments were being promoted as a means to detect delirium. This is included to illustrate that a typical patient moves wards several times and therefore objective cognitive measures are needed, and thus serial measurements of the 4AT are indicated.

**Figure 5-** This figure is the poster that was poster on wards and doctors offices to remind them to complete the 4AT and what steps should be taken next to identify causes and potential avenues for referral and treatment.

**Figure 6-** These are the slides used in the tea-trolley sessions. There are only 7 slides as brevity was hoped to engender engagement.
